# Supplementary material
Source: publisher figshare collection journal article supplement (https://gsapubs.figshare.com/ndownloader/files/25539569)
Supplement: Supplementary file 1 [file 25539569]

## SUPPLEMENTAL MATERIAL

### **Inverted South China: A novel configuration of Rodinia and its breakup**

*Xianqing Jing, David A. D. Evans, Zhenyu Yang, Yabo Tong, Yingchao Xu, Heng Wang*

#### **This file contains:**

Supplemental text

Supplementary figures (Figures S1, S2, S3, S4)

Supplementary tables (Tables S1, S2, S3)

Supplemental references

## SUPPLEMENTAL TEXT

### **Geological setting and paleomagnetic sampling**

South China is composed of the Yangtze craton to its northwest and the Cathaysia block to its southeast. Although these two parts amalgamated during early Neoproterozoic (Yao et al., 2019), the Cathaysia block was a metamorphic belt until the Mesozoic. Thus, in this paper, we prefer to use south China to represent its Yangtze craton and Cathaysia block parts, rather than South China craton

Neoproterozoic strata outcrop widely in the Three Gorges Area (TGA), Húběi Province, south China (Fig. S1). Our study area is a continuous Neoproterozoic section in Qīnglíngkǒu village (QLK; 30.801°N, 110.920°E, Fig. S1). This section is located on the west limb of the Huánglíng dome, where bedding dips generally but variably westward at shallow to moderate angles. The Liántuó Fm in QLK section can be divided into lower and upper members, which are separated by a thick conglomerate layer (Fig. S1). The lower member is dominated by purple-red fine-medium sandstone. Upward, thin fine sandstone and silty shale layers are more common. Elsewhere around the TGA, Liántuó Fm overlies Huánglíng granite with a nonconformable depositional contact, but in this section, the two units are in fault contact (An et al., 2014). Previous paleomagnetic studies on the Liántuó Fm have reported sufficient results from its upper member (Jing et al., 2015), which is dated at ca. 720 Ma (Lan et al., 2015). However, the lower member, which is deposited between 780 Ma and 750 Ma (Lan et al., 2015), still lacks detailed paleomagnetic study. Therefore, we collected a total of 128 samples (12 sites) (Fig. S1) using gasoline-powered drill from the lower member (oriented with a magnetic compass). Strata in this section dip southwest at moderate angles (~40°).

### **Laboratory methods**

All cores were cut into at least one standard specimen of 2.3 cm height and 2.54 cm diameter at Paleomagnetism Laboratory of Nanjing University. Stepwise thermal demagnetization of pilot samples was performed using an ASC-TD48 oven to isolate the

characteristic remanent magnetization. After analyzing the behavior of the pilot samples, progressive thermal demagnetization was carried using 14-16 steps at a 50 or 100°C interval for low temperatures (<550°C), and a 20 or 30°C interval for high temperatures up to 620°C, and finally with a 10°C interval to 670°C. The remanence of the specimens was measured using a 2G Enterprises Inc. cryogenic rock magnetometer (2G-755) housed in a magnetically shielded room. The remanence directions were analyzed using the principal component analysis method (Kirschvink, 1980) and the site-mean directions were calculated using Fisher spherical statistics (Fisher, 1953). Paleomagnetic software packages PMGSC (by R. Enkin), PaleoMac (Cogné, 2003) and Paleomagnetism.org (Koymans et al., 2016) were used to perform data analyses and produce related figures. GPlates software (Boyden et al., 2011) was used to reconstruct related paleogeographic figures. All the magnetic measurements were conducted at the Palaeomagnetism Laboratory of Nanjing University.

## Results

### *Thermal demagnetization*

Three remanence components are revealed by stepwise thermal demagnetization (Figure 1, S2). A low-temperature component (LTC) is separated below 400 °C in most samples (Figure S2). The mean of LTC is  $Dg=359.7^\circ$ ,  $Ig=47.0^\circ$ ,  $n=109$ ,  $k=44.9$ ,  $\alpha_{95}=2.2^\circ$  in geographic coordinates (Figure S3A). The pole derived from the LTC ( $87.4^\circ\text{N}$ ,  $296.7^\circ\text{E}$ ,  $dp/dm=1.8^\circ/2.8^\circ$ ) overlaps the present north pole (Figure S3C), so the LTC is interpreted as a recent viscous remanence which records the local present field. After removal of the LTC, many samples demagnetized directly to the origin after 500 °C (Figure 1, S2). The unblocking temperature of this high-temperature component (HTC) is 670 °C in most samples, which implies the remanence carrier is hematite. Eight sites have an east-downward directed HTC, and one site (QLK 12) has a west-upward HTC direction (Figure 1; Table S1). The site means of HTC are  $Dg=78.6^\circ$ ,  $Ig=37.9^\circ$ ,  $n=9$ ,  $k=83.2$ ,  $\alpha_{95}=5.7^\circ$  in geographic coordinates and  $Ds=98.6^\circ$ ,  $Is=70.3^\circ$ ,  $n=9$ ,  $k=79.3$ ,  $\alpha_{95}=5.8^\circ$  in stratigraphic coordinates. The fold test of McFadden (1990) on HTC, together with results of sites LT3 and LT4 from lower member of Liántuó Formation in the east limb of Huánglíng anticline (Jing et al., 2015) are positive at 95% confidence levels. Stepwise unfolding demonstrates that the precision parameter ( $k$ ) reaches its maximum at 85% but the value at 100% unfolding is insignificantly lower (Figure 1). In addition, the directions of HTC pass the reversal test (McFadden and McElhinny, 1990) at the 95% probability level (C class).

In addition, 14 samples show an intermediate-temperature component (ITC) between 400 °C and 550-590°C (Figure 1A). The mean direction of this component is  $Dg=44.0^\circ$ ,  $Ig=57.8^\circ$ ,  $n=14$ ,  $k=49.9$ ,  $\alpha_{95}=6.9^\circ$  in geographic coordinates (Figure S3B). The pole derived from this component ( $53.4^\circ\text{N}$ ,  $176.6^\circ\text{E}$ ,  $dp/dm=7.5^\circ/10.1^\circ$ ) overlaps the late Triassic pole of South China (Figure S3C), which suggests a partial late Triassic remagnetization in those samples.

## *Anisotropy of magnetic susceptibility (AMS)*

AMS measurements on 123 samples demonstrate that their minimum axes (K3, inclination=88.6°) are mainly perpendicular to the bedding plane, while the intermediate (K2, inclination=1.0) and maximum (K1, inclination=0.9) susceptibility axes are distributed along the bedding plane in stratigraphic coordinates (Figure S4). This primary sedimentary AMS (Pares et al., 1999, Figure S4) suggests that our sampling section did not experience significant penetrative structural deformation.

## SUPPLEMENTAL FIGURES

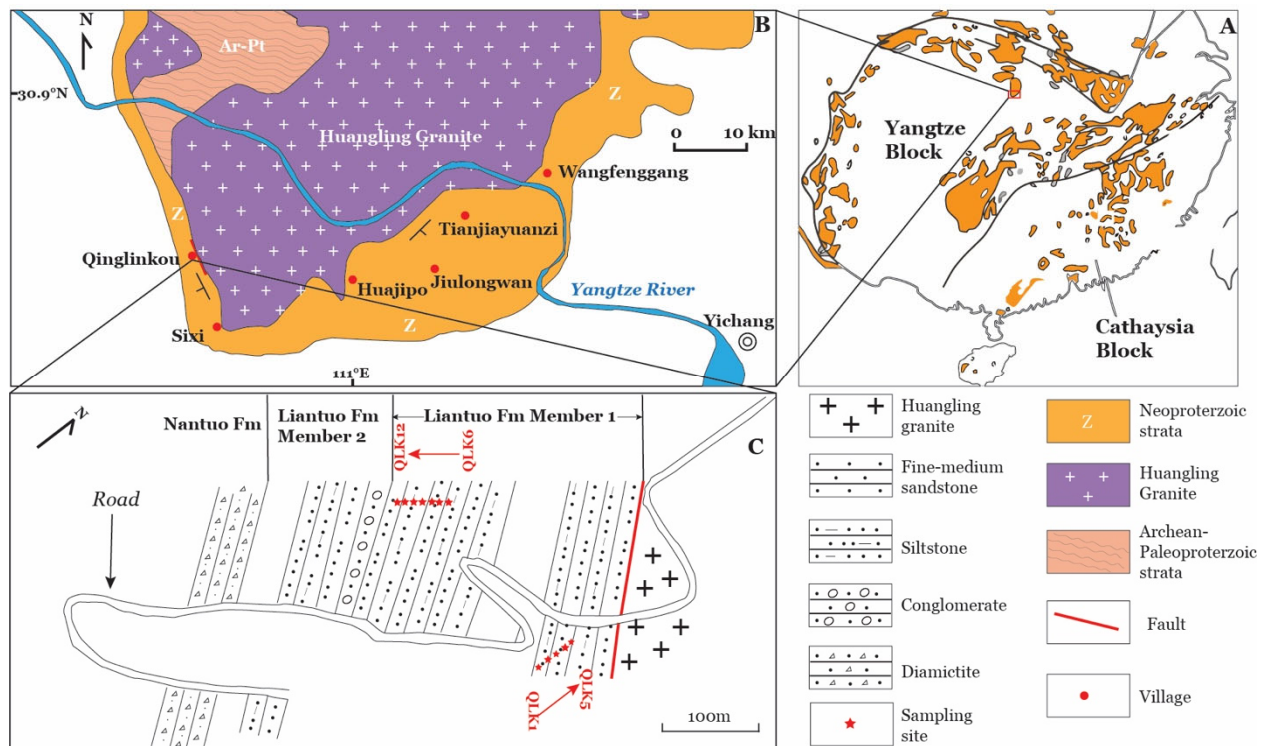

Figure S1. A: Simplified geological map showing the exposed Precambrian unit (yellow shadow area) in the South China Block. B: Simplified geological map of Three Gorges area. C: Sampling sites of Liántuó Fm distributed along the road at Qīnglíngkǒu section.

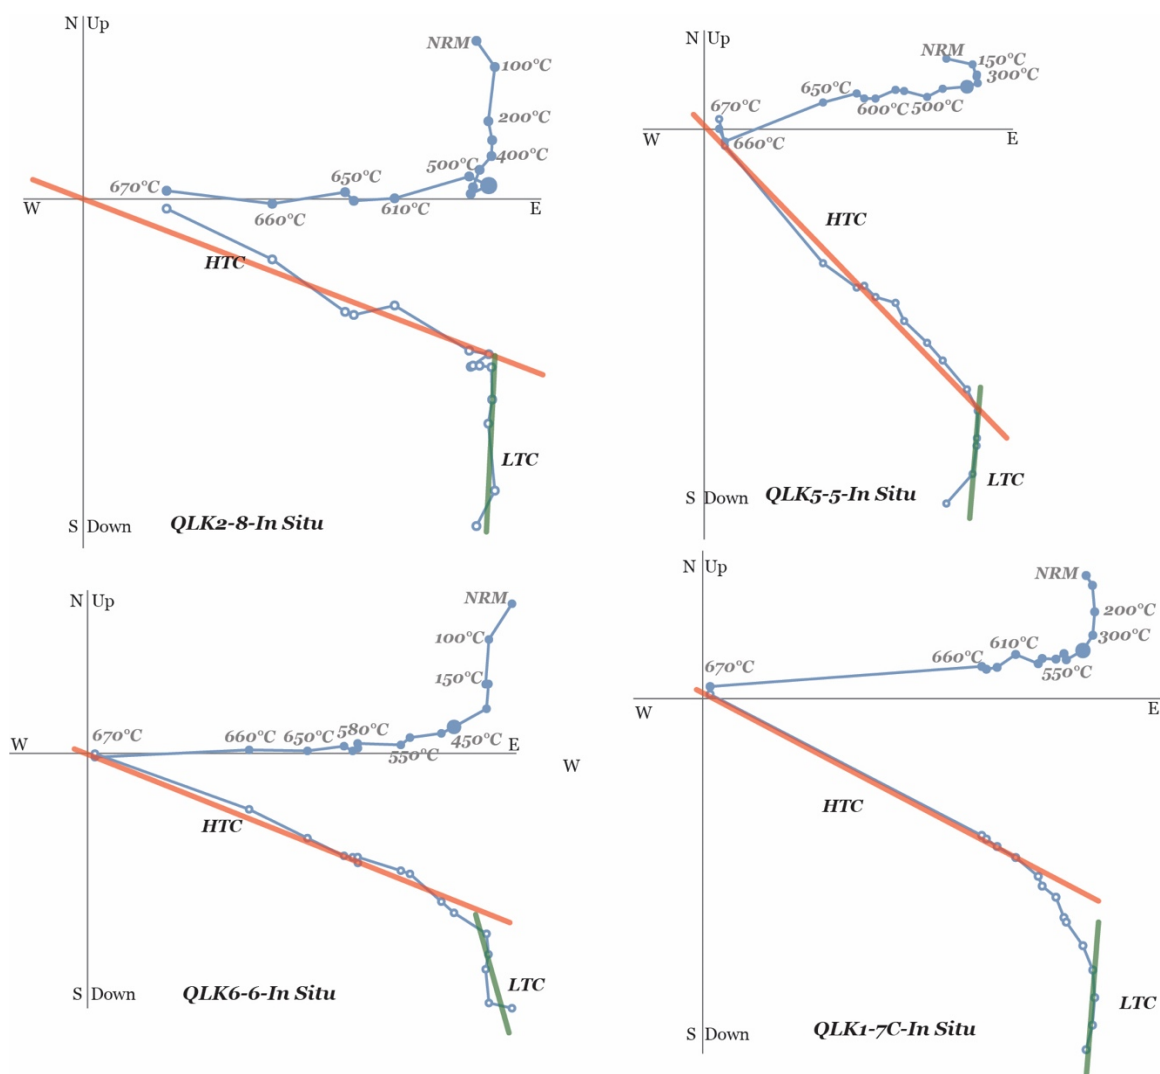

Figure S2. Orthogonal vector projection of thermal demagnetization of NRM for representative samples, in situ coordinates. Red and Green lines are fitted high temperature component (HTC) and low temperature component (LTC), respectively. Solid and open blue circles correspond to points in the horizontal (declination) and vertical (inclination) planes, respectively.

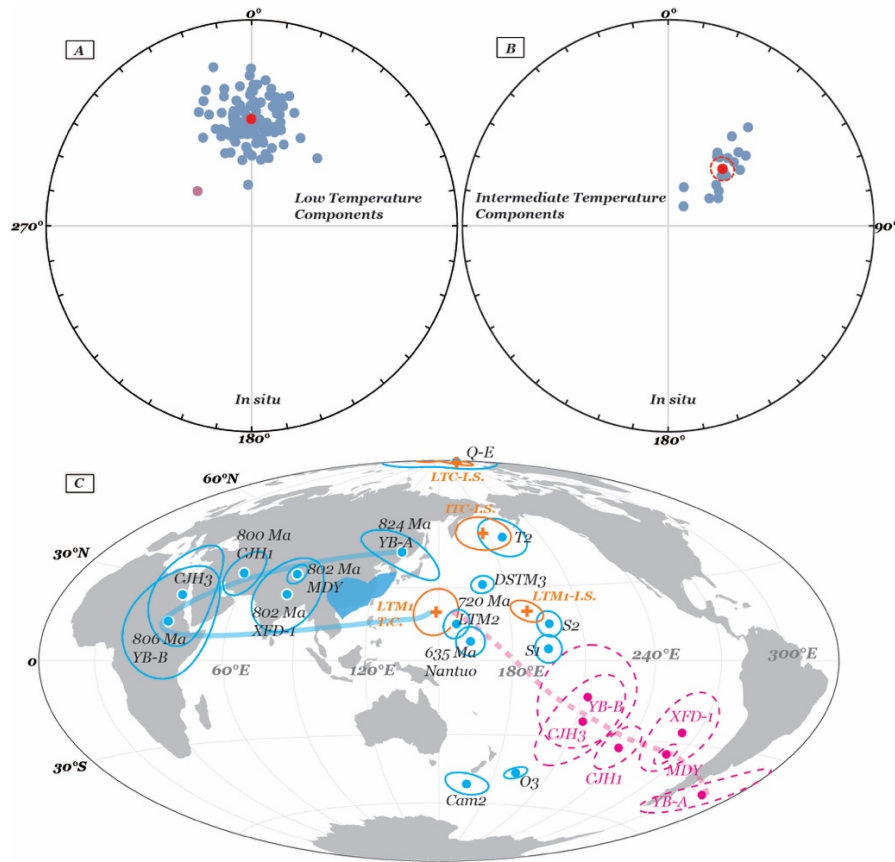

Figure S3. Equal-area stereographic projections of sample directions of the low-temperature components (A) and intermediate-temperature components (B), in situ coordinates, where filled (open) blue circles represent directions pointing down (up). Filled brown circle is a rejected sample outlier. Filled red circles are Fisher means of the samples, with the dashed red circle as 95% confidence limit. (C) Paleomagnetic poles calculated from LTC, ITC and HTC components (orange), and the existing Neoproterozoic-early Paleozoic paleopoles from the South China block shown for comparison (blue). Poles with 95% confidence ellipses ( $>760$  Ma) are shown in the traditional interpretation of polarity (solid blue) and inverted polarity option proposed herein (dashed magenta). Coarse blue and dashed magenta lines are corresponding apparent polar wander path (APWp) options during ca. 824-720 Ma. T.C. and I.S. are tilt corrected and in situ poles. References for these poles listed in table S2 and Table 7 of Jing et al. (2018).

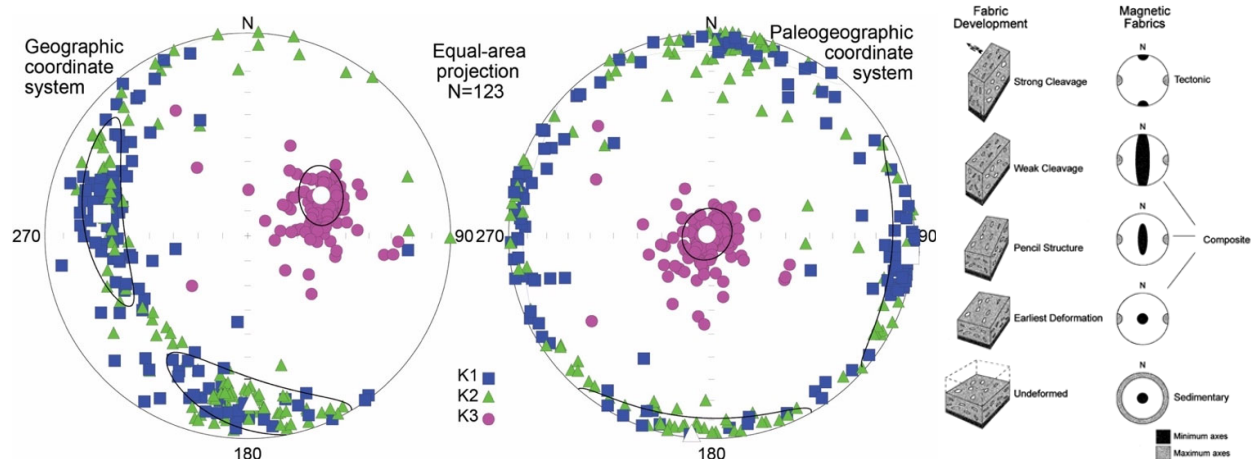

Figure S4. Equal-area and lower hemisphere projections of anisotropy of magnetic susceptibility data for the QLK sections in geographic (left) and stratigraphic (middle) coordinates. K1, K2, K3 are maximum, intermediate and minimum principal susceptibility axes. White square, triangle and circle are mean K1, K2 and K3, respectively. Also shown is the sequence of fabric development in progressively cleaved mud rocks and associated magnetic fabrics (right) from Pares et al. (1999). Magnetic fabric of our data (middle) is similar with the undeformed mud rock and a sedimentary magnetic fabric.

## SUPPLEMENTAL TABLES

Table S1. High temperature component (HTC) paleomagnetic data of Liántuó Formation Lower Member from Qīnglíngkǒu section, Húběi.

| Sample    | $n/N$ | $Dg$                                                           | $Ig$  | $Ds$  | $Is$  | $k$   |      |
|-----------|-------|----------------------------------------------------------------|-------|-------|-------|-------|------|
| QLK1      | 8     | 87.5                                                           | 34.6  | 110.3 | 65.1  | 28.8  | 10.5 |
| QLK2      | 7     | 91.8                                                           | 33.2  | 115.6 | 62.1  | 99.9  | 6.1  |
| QLK5      | 7     | 79.7                                                           | 48.6  | 116.7 | 76.4  | 13.7  | 16.9 |
| QLK6      | 11    | 81.0                                                           | 35.2  | 104.9 | 65.5  | 52.0  | 6.4  |
| QLK7      | 6     | 68.8                                                           | 39.7  | 84.7  | 73.6  | 24.1  | 13.9 |
| QLK8      | 10    | 67.8                                                           | 40.5  | 75.7  | 76.3  | 40.7  | 7.7  |
| QLK9      | 5     | 71.0                                                           | 40.0  | 78.3  | 76.9  | 166.0 | 6.0  |
| QLK10     | 12    | 74.5                                                           | 39.1  | 88.4  | 75.4  | 54.4  | 5.9  |
| QLK12     | 8     | 262.4                                                          | -27.5 | 272.8 | -56.5 | 46.7  | 8.2  |
| Site mean |       |                                                                |       |       |       |       |      |
|           | 9     | 78.6                                                           | 37.9  |       |       | 83.2  | 5.7  |
|           |       |                                                                |       | 98.6  | 70.3  | 79.3  | 5.8  |
| Paleopole |       | 20.1°N, 187.5°E, $dp/dm=4.0^\circ/6.7^\circ$ (in situ)         |       |       |       |       |      |
|           |       | 20.0°N, 148.7°E, $dp/dm=8.7^\circ/10.0^\circ$ (tilt corrected) |       |       |       |       |      |

$N$ , number of sites for statistics;  $n$ , number of samples for statistics;  $Dg$ ,  $Ig$ ,  $Ds$ ,  $Is$ , declination and inclination in geographic and stratigraphic coordinates;  $k$ , fisher precision parameter of the mean;  $\alpha_{95}$ , confidence of the mean direction;  $dp/dm$ , semi-axes of elliptical error around the pole at a probability of 95%.

Table S2. Summary of 830-720 Ma palaeomagnetic poles derived from major Precambrian blocks or terranes (with quality index Q>4; Van der Voo, 1990).

| <i>Stratigraphy</i>                     | <i>Abbreviation</i> | <i>Petrology</i> | <i>Age</i> | $\lambda$ | $\Phi$ | $dp$ | $dm$ | <i>1</i> | <i>2</i> | <i>3</i> | <i>4</i> | <i>5</i> | <i>6</i> | <i>7</i> | <i>References</i>                                              |
|-----------------------------------------|---------------------|------------------|------------|-----------|--------|------|------|----------|----------|----------|----------|----------|----------|----------|----------------------------------------------------------------|
| <b>East Svalbard</b>                    |                     |                  |            |           |        |      |      |          |          |          |          |          |          |          |                                                                |
| Svanbergfjellet 4 Mb                    | S4mb                | Limestone        | 790        | -25.9     | 46.8   | 4.3  | 7.7  | 1        | 0        | 1        | 1        | 1        | 0        | 1        | <i>Maloof et al.,2006</i><br><i>Swanson-Hysell et al.,2015</i> |
| U. Grusdievbreen Fm                     | uGfm                | Limestone        | 805        | 1.6       | 71.9   | 1.4  | 2.8  | 1        | 1        | 1        | 0        | 1        | 1        | 1        |                                                                |
| L. Grusdievbreen Fm                     | lGfm                | Limestone        | 810        | -19.6     | 31.3   | 2.2  | 4.2  | 1        | 1        | 1        | 0        | 1        | 1        | 1        |                                                                |
| <b>South China</b>                      |                     |                  |            |           |        |      |      |          |          |          |          |          |          |          |                                                                |
| Xiaofeng Dykes                          | XFD-1               | Felsic dykes     | 802±10     | 26.1      | 82.1   | 14   | 15.2 | 1        | 1        | 1        | 0        | 1        | 1        | 1        | <i>Jing et al., 2020</i>                                       |
| Yanbian dyke                            | YB-A                | Mafic dykes      | 824±6      | 45.1      | 130.4  | 19   | 19   | 1        | 1        | 1        | 1        | 0        | 1        | 1        | <i>Niu et al.,2016</i>                                         |
| Yanbian dyke                            | YB-B                | Mafic dykes      | 806±8      | 14.1      | 32.5   | 20.4 | 20.4 | 1        | 0        | 1        | 1        | 0        | 0        | 1        | <i>Niu et al.,2016</i>                                         |
| Madiyi Fm                               | MDY                 | thick red sand   | 802±6      | 34.3      | 82.4   | 3.7  | 3.9  | 1        | 1        | 1        | 1        | 1        | 1        | 1        | <i>Xian et al., 2020</i>                                       |
| Chengjiang Fm                           | CJH1                | thick red sand   | 800        | 32.8      | 56.3   | 7.1  | 8.6  | 1        | 1        | 1        | 1        | 1        | 1        | 1        | <i>Jing et al., 2020</i>                                       |
| Chengjiang Fm                           | CJH3                | thick red sand   | 790±10     | 23.8      | 33.2   | 13.5 | 20.9 | 0        | 0        | 1        | 0        | 1        | 0        | 1        | <i>Jing et al., 2020</i>                                       |
| Liantuo Fm Member 1                     | LTM1                | thick red sand   | 760        | 20.0      | 148.7  | 8.7  | 10.0 | 1        | 1        | 1        | 1        | 1        | 1        | 1        | <i>This study</i>                                              |
| Liantuo Fm Member 2                     | LTM2                | Red mudstone     | 720        | 13.2      | 155.2  | 5.3  | 5.3  | 1        | 1        | 1        | 0        | 1        | 1        | 1        | <i>Jing et al.,2015</i>                                        |
| <b>Australia</b>                        |                     |                  |            |           |        |      |      |          |          |          |          |          |          |          |                                                                |
| Mundine Well dyke swarm                 | MDS                 | Mafic dykes      | 755±3      | 45.3      | 135.4  | 4.1  | 4.1  | 1        | 1        | 1        | 1        | 1        | 0        | 0        | <i>Wingate&amp;Giddings,2000</i>                               |
| Johnny's creek Member                   | JCM                 | Red siltstone    | 770±30     | 15.8      | 83.0   | 13.5 | 13.5 | 0        | 1        | 1        | 1        | 1        | 0        | 1        | <i>Swanson-Hysell et al.,2012</i>                              |
| Browne Fm                               | Brf                 | Red siltstone    | 830-800    | 44.5      | 141.7  | 5.1  | 9    | 1        | 1        | 1        | 0        | 1        | 0        | 0        | <i>Pisarevsky et al., 2007</i>                                 |
| <b>India</b>                            |                     |                  |            |           |        |      |      |          |          |          |          |          |          |          |                                                                |
| Malani Igneous Suite                    | MIS                 | Felsic rocks     | 750        | 69.4      | 75.7   | 6.5  | 6.5  | 1        | 1        | 1        | 1        | 1        | 1        | 1        | <i>Meert et al.,2013</i>                                       |
| <b>Laurentia</b>                        |                     |                  |            |           |        |      |      |          |          |          |          |          |          |          |                                                                |
| Gunbarrel mafic magmatic                | Gb                  | Mafic rocks      | 775        | 9.1       | 138.2  | 11.7 | 11.7 | 1        | 1        | 1        | 0        | 1        | 0        | 1        | <i>Eyster et al., 2020</i>                                     |
| Uinta Mountain Group 1                  | UMG1                | Red siltstone    | 766        | 3.0       | 163.5  | 3.2  | 3.2  | 1        | 1        | 1        | 0        | 1        | 1        | 1        | <i>Eyster et al., 2020</i>                                     |
| Uinta Mountain Group 2                  | UMG2                | Red siltstone    | 760        | -5.8      | 158.7  | 2.7  | 2.7  | 0        | 1        | 1        | 0        | 1        | 0        | 1        | <i>Eyster et al., 2020</i>                                     |
| Uinta Mountain Group 3                  | UMG3                | Red siltstone    | 755        | 4.9       | 160.6  | 3.2  | 3.2  | 0        | 1        | 1        | 0        | 1        | 0        | 1        | <i>Eyster et al., 2020</i>                                     |
| Nankoweap Fm                            | Nan                 | Red sandstone    | 760        | -10.0     | 163.0  | 3.5  | 9.3  | 0        | 1        | 1        | 1        | 1        | 1        | 1        | <i>Weil et al., 2003</i>                                       |
| Galeros-Carbon Canyon                   | GCC                 | Sandstone        | 757        | -0.5      | 166.0  | 9.7  | 9.7  | 1        | 1        | 1        | 1        | 1        | 0        | 1        | <i>Eyster et al., 2020</i>                                     |
| Kwagunt (Carbon Butte-Awatubi) combined | Kwa                 | Sandstone        | 751        | 14.2      | 163.8  | 3.5  | 3.5  | 1        | 1        | 1        | 1        | 1        | 0        | 1        | <i>Eyster et al., 2020</i>                                     |
| Franklin large igneous province         | FLIP                | Mafic rocks      | 716        | 8.4       | 163.8  | 2.8  | 2.8  | 1        | 1        | 1        | 1        | 1        | 1        | 0        | <i>Denyszyn et al.,2009</i>                                    |

1–7, reliability criteria of Van der Voo (1990): 1-Well-dated rock age, 2-Sufficient number of samples, 3-Adequate demagnetization, 4-Field tests, 5-Structural control and tectonic coherence with craton or block involved, 6-Presence of reversals, 7-No resemblance to paleopoles of younger age.  $\lambda$ , latitude of the paleopoles;  $\Phi$ , longitude of the paleopoles;  $dp/dm$ , semi-axes of elliptical error around the pole at 95% probability.



Table S3. Euler parameters for the reconstruction of Rodinia at 760 and 800 Ma. Laurentia is reconstructed relative to the absolute frame; other plates are reconstructed relative to Laurentia.

| Plates      | Age | Euler parameter |           |         |
|-------------|-----|-----------------|-----------|---------|
|             |     | Latitude        | Longitude | Angle   |
| Laurentia   | 760 | 22.33           | 223.34    | -100.06 |
| Laurentia   | 800 | 22.33           | 223.34    | -100.06 |
| Svalbard    | 760 | 86.01           | 31.29     | -92.10  |
| Svalbard    | 800 | 86.01           | 31.29     | -92.10  |
| South China | 760 | -7.02           | 333.20    | 179.20  |
| South China | 800 | 12.65           | 16.92     | 164.03  |
| India       | 760 | 39.96           | 145.56    | 161.24  |
| India       | 800 | 16.84           | 183.46    | 216.68  |
| Kalahari    | 760 | 30.98           | 335.60    | -145.72 |
| Kalahari    | 800 | 30.98           | 335.60    | -145.72 |
| Amazonia    | 760 | 14.10           | 313.42    | -112.23 |
| Amazonia    | 800 | 14.10           | 313.42    | -112.23 |
| Baltica     | 760 | 76.15           | 296.69    | -66.93  |
| Baltica     | 800 | 76.15           | 296.69    | -66.93  |
| Siberia     | 760 | 74.35           | 132.05    | -166.44 |
| Siberia     | 800 | 74.35           | 132.05    | -166.44 |
| Australia   | 760 | -27.37          | 323.22    | -127.09 |
| Australia   | 800 | -27.37          | 323.22    | -127.09 |
| Tarim       | 760 | 69.52           | 348.68    | 116.31  |
| Tarim       | 800 | 69.52           | 348.68    | 116.31  |

## SUPPLEMENTAL REFEEERENCES

- An, Z., Tong, J., Ye, Q., Tian, L., Song, H., and Zhao, X., 2014, Neoproterozoic Stratigraphic Sequence and Sedimentary Evolution at Qinglinkou Section, East Yangtze Gorges Area: *Earth Science-Journal of China University of Geoscience(in Chinese)*, v. 39.
- Boyden, J.A., Müller, R.D., Gurnis, M., Torsvik, T.H., Clark, J.A., Turner, M., Ivey-Law, H., Watson, R.J., and Cannon, J.S., 2011, Next-generation plate-tectonic reconstructions using GPlates, *in* Keller, G.R. and Baru, C. eds., *Geoinformatics*, Cambridge, Cambridge University Press, p. 95–114, doi:10.1017/CBO9780511976308.008.
- Cogné, J.P., 2003, PaleoMac: A Macintosh<sup>TM</sup> application for treating paleomagnetic data and making plate reconstructions: *Geochemistry, Geophysics, Geosystems*, v. 4, p. 1–8, doi:10.1029/2001GC000227.
- Denyszyn, S.W., Halls, H.C., Davis, D.W., and Evans, D. a. D., 2009, Paleomagnetism and U-Pb geochronology of Franklin dykes in High Arctic Canada and Greenland: a revised age and paleomagnetic pole constraining block rotations in the Nares Strait region: *Canadian*

- Journal of Earth Sciences, v. 46, p. 689–705, doi:10.1139/E09-042.
- Eyster, A., Weiss, B.P., Karlstrom, K., and Macdonald, F.A., 2019, Paleomagnetism of the Chuar Group and evaluation of the late Tonian Laurentian apparent polar wander path with implications for the makeup and breakup of Rodinia: *GSA Bulletin*, doi:10.1130/B32012.1.
- Fisher, R., 1953, Dispersion on a Sphere: *Proceedings of the Royal Society A: Mathematical, Physical and Engineering Sciences*, v. 217, p. 295–305, doi:10.1098/rspa.1953.0064.
- Jing, X., Yang, Z., Evans, D.A.D., Tong, Y., Xu, Y., and Wang, H., 2020, A pan-latitudinal Rodinia in the Tonian true polar wander frame: *Earth and Planetary Science Letters*, v. 530, p. 115880, doi:10.1016/j.epsl.2019.115880.
- Jing, X., Yang, Z., Tong, Y., and Han, Z., 2015, A revised paleomagnetic pole from the mid-Neoproterozoic Liantuo Formation in the Yangtze block and its paleogeographic implications: *Precambrian Research*, v. 268, doi:10.1016/j.precamres.2015.07.007.
- Jing, X., Yang, Z., Tong, Y., Wang, H., and Xu, Y., 2018, Identification of multiple magnetizations of the Ediacaran strata in South China: *Geophysical Journal International*, v. 212, p. 54–75, doi:10.1093/gji/ggx396.
- Kirschvink, J.L., 1980, The least-squares line and plane and the analysis of palaeomagnetic data: *Geophysical Journal International*, v. 62, p. 699–718, doi:10.1111/j.1365-246X.1980.tb02601.x.
- Koymans, M.R., Langereis, C.G., Pastor-Galán, D., and van Hinsbergen, D.J.J., 2016, Paleomagnetism.org: An online multi-platform open source environment for paleomagnetic data analysis: *Computers and Geosciences*, v. 93, p. 127–137, doi:10.1016/j.cageo.2016.05.007.
- Lan, Z., Li, X.H., Zhu, M., Zhang, Q., and Li, Q.L., 2015, Revisiting the Liantuo Formation in Yangtze Block, South China: SIMS U-Pb zircon age constraints and regional and global significance: *Precambrian Research*, v. 263, p. 123–141, doi:10.1016/j.precamres.2015.03.012.
- Maloof, A.C., Halverson, G.P., Kirschvink, J.L., Schrag, D.P., Weiss, B.P., and Hoffman, P.F., 2006, Combined paleomagnetic, isotopic, and stratigraphic evidence for true polar wander from the Neoproterozoic Akademikerbreen Group, Svalbard, Norway: *Bulletin of the Geological Society of America*, v. 118, p. 1099–1124, doi:10.1130/B25892.1.
- McElhinny, M.W., 1964, Statistical Significance of the Fold Test in Palaeomagnetism: *Geophysical Journal of the Royal Astronomical Society*, v. 8, p. 338–340, doi:10.1111/j.1365-246X.1964.tb06300.x.
- McFadden, P.L., 1990, A new fold test for palaeomagnetic studies: *Geophysical Journal International*, v. 103, p. 163–169, doi:10.1111/j.1365-246X.1990.tb01761.x.
- McFadden, P.L., and Lowes, F.J., 1981, The discrimination of mean directions drawn from Fisher distributions: *Geophysical Journal of the Royal Astronomical Society*, v. 67, p. 19–33, doi:10.1111/j.1365-246X.1981.tb02729.x.
- McFadden, P.L., and McElhinny, M.W., 1990, Classification of the reversals test in palaeomagnetism: *Geophysical Journal International*, v. 103, p. 725–729.

- Meert, J.G., Pandit, M.K., and Kamenov, G.D., 2013, Further geochronological and paleomagnetic constraints on Malani (and pre-Malani) magmatism in NW India: *Tectonophysics*, v. 608, p. 1254–1267, doi:10.1016/j.tecto.2013.06.019.
- Niu, J., Li, Z.-X., and Zhu, W., 2016, Palaeomagnetism and geochronology of mid-Neoproterozoic Yanbian dykes, South China: implications for a c. 820–800 Ma true polar wander event and the reconstruction of Rodinia: *Geological Society, London, Special Publications*, v. 424, p. 191–211, doi:10.1144/SP424.11.
- Pares, J.P., Van Der Pluijm, B.A., and Dinarès-Turell, J., 1999, Evolution of magnetic fabric during incipient deformation of mudrock (Pyrenees, northern Spain): *Tectonophysics*, v. 307, p. 1–14.
- Pisarevsky, S.A., Wingate, M.T.D., Stevens, M.K., and Haines, P.W., 2007, Palaeomagnetic results from the Lancer 1 stratigraphic drillhole, Officer Basin, Western Australia, and implications for Rodinia reconstructions: *Australian Journal of Earth Sciences*, v. 54, p. 561–572, doi:10.1080/08120090701188962.
- Swanson-Hysell, N.L., Maloof, A.C., Condon, D.J., Jenkin, G.R.T., Alene, M., Tremblay, M.M., Tesema, T., Rooney, A.D., and Haileab, B., 2015, Stratigraphy and geochronology of the Tambien Group, Ethiopia: Evidence for globally synchronous carbon isotope change in the Neoproterozoic: *Geology*, v. 43, p. 323–326, doi:10.1130/G36347.1.
- Swanson-Hysell, N.L., Maloof, A.C., Kirschvink, J.L., Evans, D.A.D., Halverson, G.P., and Hurtgen, M.T., 2012, Constraints on neoproterozoic paleogeography and paleozoic orogenesis from paleomagnetic records of the bitter springs formation, amadeus basin, central Australia: *American Journal of Science*, v. 312, p. 817–884, doi:10.2475/08.2012.01.
- Van der Voo, R., 1990, The reliability of paleomagnetic data: *Tectonophysics*, v. 184, p. 1–9, doi:10.1016/0040-1951(90)90116-P.
- Weil, A.B., Geissman, J.W., Heizler, M., and Van der Voo, R., 2003, Paleomagnetism of Middle Proterozoic mafic intrusions and Upper Proterozoic (Nankoweap) red beds from the Lower Grand Canyon Supergroup, Arizona: *Tectonophysics*, v. 375, p. 199–220, doi:10.1016/S0040-1951(03)00339-1.
- Wingate, M.T.D., and Giddings, J.W., 2000, Age and palaeomagnetism of the Mundine Well dyke swarm, Western Australia: implications for an Australia–Laurentia connection at 755 Ma: *Precambrian Research*, v. 100, p. 335–357.
- Xian, H., Zhang, S., Li, H., Yang, T., and Wu, H., 2020, Geochronological and palaeomagnetic investigation of the Madiyi Formation, lower Banxi Group, South China: Implications for Rodinia reconstruction: *Precambrian Research*, v. 336, doi:10.1016/j.precamres.2019.105494.
- Yao, J., Cawood, P.A., Shu, L., and Zhao, G., 2019, Jiangnan Orogen, South China: A ~970–820 Ma Rodinia margin accretionary belt: *Earth-Science Reviews*, v. 196, p. 102872, doi:10.1016/j.earscirev.2019.05.016
